# Supplementary material
Source: HighWire-hosted journal article supplement (http://www.qdcxjkg.com/highwire/filestream/113606/field_highwire_adjunct_files/9/patient_info__-_tests_conducted_in_tb_clinics_-_farsi.pdf)
Supplement: patient_info__-_tests_conducted_in_tb_clinics_-_farsi.pdf [file patient_info__-_tests_conducted_in_tb_clinics_-_farsi.pdf]

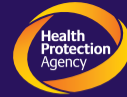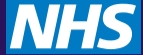

## آزمایش‌هایی که در کلینیک‌های سل انجام می‌شود

Patient information:

HIV testing in TB clinics (Farsi)

### عکسبرداری از سینه با اشعه ایکس

هدف از این آزمایش آن است که معلوم شود آیا به سل ریوی مبتلا هستید یا خیر. این آزمایش ممکن است بعداً تکرار شود تا اطمینان حاصل شود که درمان مؤثر بوده است.

### آزمایش بزاق/آزمایش خلط

ممکن است از شما خواسته شود که نمونه‌هایی از بزاق خود را ارائه دهید تا معلوم شود که آیا به سل ریوی مبتلا هستید یا خیر. این آزمایش ممکن است بعداً تکرار شود تا اطمینان حاصل شود که درمان مؤثر بوده است.

### آزمایش خون

آزمایش خون می‌تواند نشان دهد که آیا کم خون هستید یا نه و آیا عفونتی در بدن دارید یا خیر. تکرار این آزمایشها پس از آغاز درمان می‌تواند به ما نشان دهد که آیا عفونت در حال برطرف شدن است یا خیر.

آزمایشهای دیگری هم انجام می‌شود تا روشن شود که کبد و کلیه‌های شما پیش از درمان و حین درمان در چه وضعی هستند. این آزمایشها از آن رو حائز اهمیت هستند که بعضی از داروها می‌توانند بر طرز کار کبد و کلیه اثر بگذارند.

## اطلاعات بیشتر

اچ - آی - وی

NAHIP: [www.nahip.org.uk](http://www.nahip.org.uk)

Do It Right:

[www.doitright.uk.com](http://www.doitright.uk.com)

THT: [www.tht.org.uk](http://www.tht.org.uk)

سل

NKS TB:

[www.hpa.org.uk/tbknowledge](http://www.hpa.org.uk/tbknowledge)

TB Alert: [www.tbalert.org](http://www.tbalert.org)

سایت های مفید دیگر

NHS choices: [www.nhs.uk](http://www.nhs.uk)

Health Protection Agency:

[www.hpa.org.uk](http://www.hpa.org.uk)

## رازداری

نتایج آزمایشهای شما محرمانه تلقی خواهند شد و اطلاعات مربوطه فقط در اختیار آن دسته از کارکنان بهداشتی قرار خواهد گرفت که کارشان مستقیماً به حفظ سلامتی شما مربوط باشد..

## آزمایش در مورد سایر عفونت ها

بعلاوه ممکن است آزمایشهای مربوط به هپاتیت یا آماس کبد (از نوع عفونت های B و C) را در مورد شما انجام دهیم. این عفونت ها می توانند بر طرز کار کبد شما و در نتیجه بر درمان سل شما اثر بگذارند. اگر نتیجه آزمایش شما "مثبت" باشد یعنی نشان دهد که امکان عفونت در میان است ممکن است شما به کارشناسان مربوطه ارجاع بشوید.

## آزمایشهای مربوط به سایر عفونت ها

ما آزمایش اچ - آی - وی (مربوط به احتمال بروز بیماری ایدز) را به هر کسی که در کلینیک سل حضور یابد ارائه می کنیم. اچ - آی - وی سیستم دفاعی بدن را نابود می کند و خطر شدت گرفتن سل را افزایش می دهد. برای اچ-آی-وی درمان هایی وجود دارد که می توانند سلامتی شما را بهبود بخشند.
